# Supplementary material
Source: Research Square preprint supplement (doi:10.21203/rs.3.rs-9423141/v1)
Supplement: Supplementary file 1 [file a6949553283a1828d6979847.docx]

**Table 1 PPB Clinical Characteristics**

| **Subtype** | **Type I** | **Type II** | **Type III** |
| --- | --- | --- | --- |
| Number of Cases | 7 | 7 | 31 |
| Age（months） | 5 (0.7-47) | 26 (0.5-34) | 36 (23-54) |
| Male: Female | 2:05 | 5:02 | 21:10 |
| Clinical Symptoms |  |  |  |
| Cough | 5 | 5 | 20 |
| Dyspnea | 3 | 4 | 11 |
| Fever | 0 | 1 | 15 |
| Other symptoms | 0 | 1 | 10 |
| Imaging Characteristics |  |  |  |
| Location |  |  |  |
| Left Side | 5 | 3 | 15 |
| Right Side | 2 | 4 | 16 |
| Tumor Size |  |  |  |
| < 10 cm | 5 | 4 | 16 |
| > 10 cm | 2 | 3 | 15 |
| Compression of Airway | 0 | 3 | 23 |
| Pleural Effusion | 0 | 2 | 8 |
| Pneumothorax | 1 | 1 | 1 |
| Preoperative Chest Drainage Placement | 1 | 2 | 5 |
| Preoperative tracheal intubation | 0 | 1 | 4 |

**Other symptoms** include chest pain, abdominal pain, vomiting and loss of appetite.

**Table 2 The clinical management and prognosis of Type I PPB**

| **Case** | **Gender** | **Age（months）** | **Location** | **Surgical Method** | **Postoperative Survival** |
| --- | --- | --- | --- | --- | --- |
| Case 1 | Female | 47 | Left upper lobe | Lesion excision | Survived till now, total 16 years |
| Case 2 | Female | 36 | Right lower lobe | Lesion excision | Survived till now, total 11 years |
| Case 3 | Female | 17 | Right upper lobe | Lesion excision | Survived till now, total 10 years |
| Case 4 | Male | 0.7 | Left upper lobe | Lesion excision | Survived till now, total 8 years |
| Case 5 | Male | 1.3 | Left upper lobe | Lesion excision | Survived till now, total 7 years |
| Case 6 | Female | 4 | Left upper lobe | Lobectomy | Survived till now, total 1 year |
| Case 7 | Female | 5 | Left lower lobe | Lesion excision，Recurrence 1 month later, underwent lobectomy | Survived till now, total 1 year |

**Table 3 The clinical management and prognosis of Type II PPB**

| **Case** | **Gender** | | **Age（months）** | **Location** | **Surgical Method** | **Residual Disease After Surgery** | **Metastasis** | **Post-Surgery Treatment** | **Post-Surgery Survival** |
| --- | --- | --- | --- | --- | --- | --- | --- | --- | --- |
| Case 1 | | Female | 26 | Left upper lobe, pleura | Lesion resection | None | None | Chemotherapy | Lost to follow-up |
| Case 2 | | Male | 33 | Right lower lobe, pleura | Lesion resection | None | None | Chemotherapy | Alive for 12 years till now |
| Case 3 | | Male | 18 | Right upper lobe | Lesion resection | None | Bone metastasis | None | No chemotherapy, relapse after 2 months |
| Case 4 | | Male | 27 | Left upper lobe, pleura, mediastinum, diaphragm | Lesion resection | None | None | Chemotherapy | Alive for 10 years till now |
| Case 5 | | Male | 34 | Left upper lobe, diaphragm | Lesion resection | None | None | Chemotherapy | Alive for 8 years till now |
| Case 6 | | Male | 24 | Left upper lobe | Lesion resection | Residual disease | Lymph node metastasis | Chemotherapy | Alive for 3 years till now |
| Case 7 | | Female | 0.5 | Left lower lobe, pleura | Lesion resection | None | None | None | Declined treatment, died 3 days after surgery |

**Table 4 The clinical management and prognosis of Type III PPB**

| **Group** | **Post-Surgery Adjuvant Treatment Group** | **Post-Surgery Non-Adjuvant Treatment Group** |
| --- | --- | --- |
| **Number of Patients** | 19 | 9 |
| **Tumor Location** |  |  |
| Lungs | 16 | 8 |
| Pleura | 5 | 1 |
| Mediastinum | 3 | 4 |
| Diaphragm | 2 | 3 |
| Chest Wall | 5 | 1 |
| **Surgical Method** |  |  |
| Complete Resection | 16 | 4 |
| Partial Resection | 3 | 5 |
| **Distant Metastasis** | 1 | 4 |
| **Adjuvant Treatment Method** |  |  |
| Chemotherapy | 20 | 0 |
| Radiotherapy | 3 | 0 |
| intrathoracic hyperthermic treatment | 1 | 0 |
| **Treatment Process and Complications** |  |  |
| Relapse | 4 | 0 |
| Metastasis | 2 | 0 |
| **Current Survival Status** | 12 | 0 |
